# Supplementary material for: THFS-carbon: a theoretical prediction of metallic carbon allotrope with half-auxeticity, planar tetracoordinate carbon, and potential application as anode for sodium-ion batteries
Source: Royal Society of Chemistry journal article supplement (doi:10.1039/d3cp01499a), 2023-01-01
Supplement: d3cp01499a1.pdf [file d3cp01499a1.pdf]

## Supplementary Information

**THFS-carbon: a theoretical prediction of metallic carbon allotrope with half-  
auxeticity, planar tetracoordinate carbon, and potential application as anode for  
sodium-ion batteries**

Tian-Kai Li,<sup>a</sup> Xiao-Juan Ye,<sup>b</sup> Lan Meng,<sup>a</sup> Chun-Sheng Liu<sup>a,\*</sup>

<sup>a</sup>College of Electronic and Optical Engineering, Nanjing University of Posts and  
Telecommunications, Nanjing 210023, China

<sup>b</sup>College of Integrated Circuit Science and Engineering, Nanjing University of Posts a  
nd Telecommunications, Nanjing 210023, China

\*Email: [csliu@njupt.edu.cn](mailto:csliu@njupt.edu.cn)

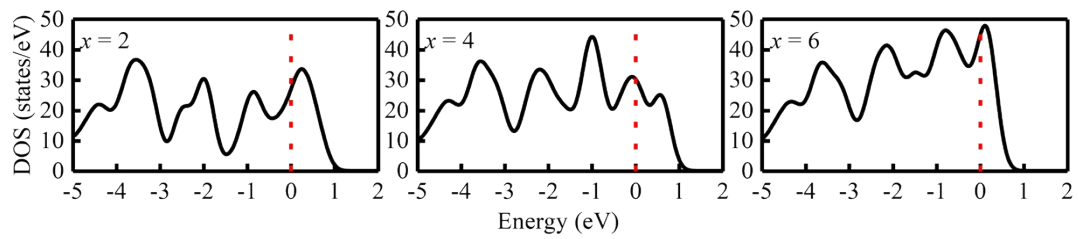

**Fig. S1** Total DOS of THFS-carbon monolayer at various concentrations ( $x$ ) of sodium.
